# Supplementary material for: Elimination of hydrogenase active site assembly blocks H2 production and increases ethanol yield in Clostridium thermocellum
Source: PubMed Central journal article supplement (PMC4355364; doi:10.1186/s13068-015-0204-4), 2015-02-12

Additional File 1.

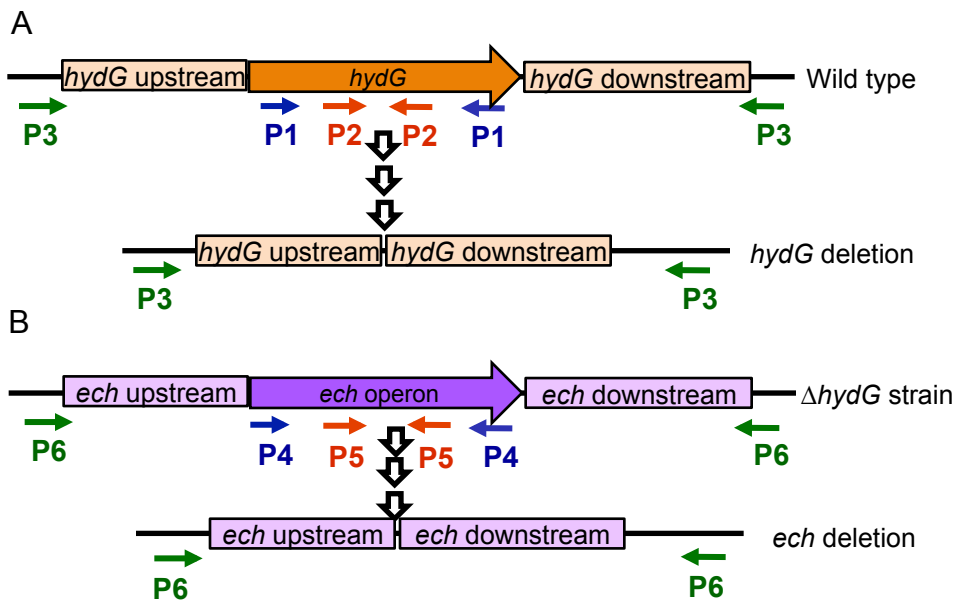

**C**

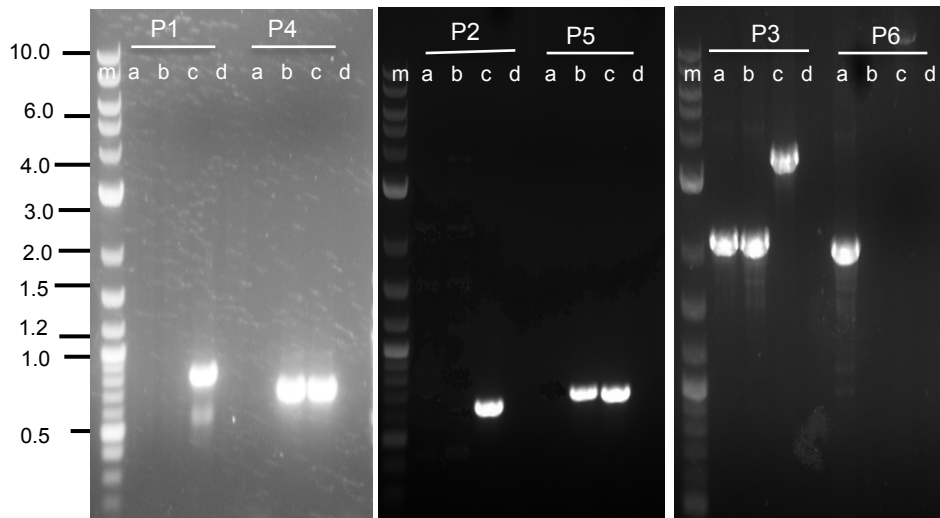

Additional File 2.

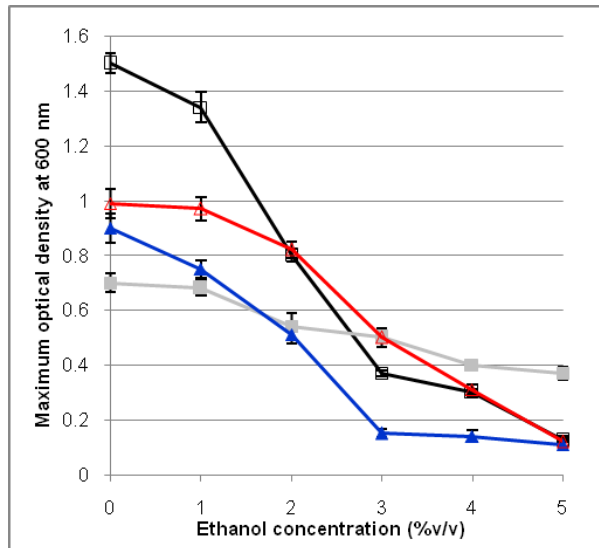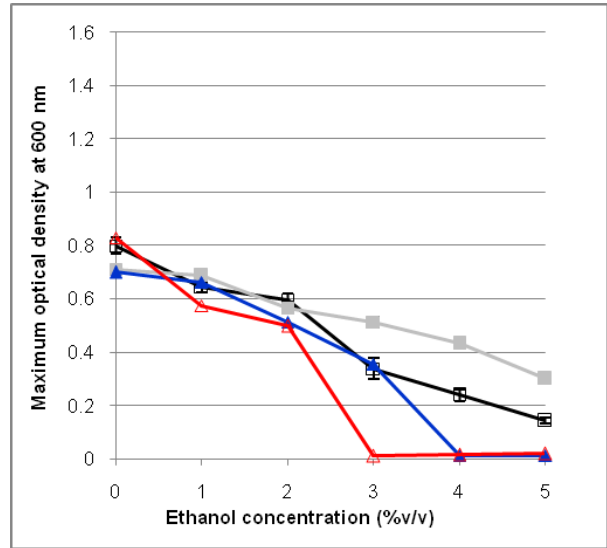

Supplement: 13068_2015_204_MOESM1_ESM.pdf [file 13068_2015_204_MOESM1_ESM.pdf]
