# Supplementary material for: Elimination of hydrogenase active site assembly blocks H2 production and increases ethanol yield in Clostridium thermocellum
Source: PubMed Central journal article supplement (PMC4355364; doi:10.1186/s13068-015-0204-4), 2015-02-12
Supplement: 13068_2015_204_MOESM4_ESM.pdf [file 13068_2015_204_MOESM4_ESM.pdf]

**Additional File 4. List of primers used in this study.**

| <b>Primer name</b> | <b>Sequence, 5'→3'</b>   |
|--------------------|--------------------------|
| P1- forward        | GGGGATATTCAAATGGTTGA     |
| P1/P2- reverse     | GAACAGATATGGTGTGCGGC     |
| P2-forward         | CCTGGGAGAAGTTGCAAAGC     |
| P3-forward         | GCTGTAAGTCTTCGGTGAGAGTT  |
| P3- reverse        | CTCACTTTTGTAGAATCCACACCT |
| P4- forward        | AATTTTTAGCAAATGCGGGG     |
| P4- reverse        | CCCTTTCAATGAAGCTTGCC     |
| P5-forward         | TTCTGGCTTCTCAACATTAATGG  |
| P5- reverse        | CGTAAGAATCAGAGAAGTTTTTCA |
| P6-forward         | AGCGCGGATATATGATGGC      |
| P6- reverse        | CGTAAGCGAAATTGAAAAGGAA   |
| XD520              | TTCTTCGTTATTCTTGCCCT     |
| XD521              | TTGTCTGCCTGTTGCATT       |
| XD560              | TGCCTTCTGTCCCATCTT       |
